# Supplementary material for: Development of Loop-Mediated Isothermal Amplification Assay for the Rapid Detection of Pyrenophora graminea in Barley Seeds
Source: MDPI journal article supplement (doi:10.3390/agronomy13010062), 2022-12-24
Supplement: s1 [file s1]

**Table S1.** Fungal species, host, origin and the test results in loop-mediated isothermal amplification (LAMP) assay.

| No. | Species                     | Isolates | Host                     | Location          | LAMP assay |
|-----|-----------------------------|----------|--------------------------|-------------------|------------|
| 1   | <i>Pyrenophora graminea</i> | P. g-1   | <i>Hordeum vulgare</i> . | Haidong, Qinghai  | +          |
| 2   | <i>P. graminea</i>          | P. g-2   | <i>H. vulgare</i>        | Haidong, Qinghai  | +          |
| 3   | <i>P. graminea</i>          | P. g-3   | <i>H. vulgare</i>        | Huangnan, Qinghai | +          |
| 4   | <i>P. graminea</i>          | P. g-4   | <i>H. vulgare</i>        | Hainan, Qinghai   | +          |
| 5   | <i>P. graminea</i>          | P. g-5   | <i>H. vulgare</i>        | Hainan, Qinghai   | +          |
| 6   | <i>P. graminea</i>          | P. g-6   | <i>H. vulgare</i>        | Hainan, Qinghai   | +          |
| 7   | <i>P. graminea</i>          | P. g-7   | <i>H. vulgare</i>        | Hainan, Qinghai   | +          |
| 8   | <i>P. graminea</i>          | P. g-8   | <i>H. vulgare</i>        | Hainan, Qinghai   | +          |
| 9   | <i>P. graminea</i>          | P. g-9   | <i>H. vulgare</i>        | Hainan, Qinghai   | +          |
| 10  | <i>P. graminea</i>          | P. g-10  | <i>H. vulgare</i>        | Hainan, Qinghai   | +          |
| 11  | <i>P. graminea</i>          | P. g-11  | <i>H. vulgare</i>        | Hainan, Qinghai   | +          |
| 12  | <i>P. graminea</i>          | P. g-12  | <i>H. vulgare</i>        | Xining, Qinghai   | +          |
| 13  | <i>P. graminea</i>          | P. g-13  | <i>H. vulgare</i>        | Xining, Qinghai   | +          |
| 14  | <i>P. graminea</i>          | P. g-14  | <i>H. vulgare</i>        | Datong, Qinghai   | +          |
| 15  | <i>P. graminea</i>          | P. g-15  | <i>H. vulgare</i>        | Haibei, Qinghai   | +          |
| 16  | <i>P. graminea</i>          | P. g-16  | <i>H. vulgare</i>        | Haibei, Qinghai   | +          |
| 17  | <i>P. graminea</i>          | P. g-17  | <i>H. vulgare</i>        | Xining, Qinghai   | +          |
| 18  | <i>P. graminea</i>          | P. g-18  | <i>H. vulgare</i>        | Xining, Qinghai   | +          |

|    |                          |         |                       |                  |   |
|----|--------------------------|---------|-----------------------|------------------|---|
| 19 | <i>P. graminea</i>       | P. g-19 | <i>H. vulgare</i>     | Haibei, Qinghai  | + |
| 20 | <i>P. graminea</i>       | P. g-20 | <i>H. vulgare</i>     | Haibei, Qinghai  | + |
| 21 | <i>P. graminea</i>       | P. g-21 | <i>H. vulgare</i>     | Haibei, Qinghai  | + |
| 22 | <i>P. graminea</i>       | P. g-22 | <i>H. vulgare</i>     | Haibei, Qinghai  | + |
| 23 | <i>P. graminea</i>       | P. g-23 | <i>H. vulgare</i>     | Haidong, Qinghai | + |
| 24 | <i>P. graminea</i>       | P. g-24 | <i>H. vulgare</i>     | Haidong, Qinghai | + |
| 25 | <i>P. graminea</i>       | P. g-52 | <i>H. vulgare</i>     | Haidong, Qinghai | + |
| 26 | <i>P. graminea</i>       | P. g-26 | <i>H. vulgare</i>     | Xining, Qinghai  | + |
| 27 | <i>P. graminea</i>       | P. g-27 | <i>H. vulgare</i>     | Haixi, Qinghai   | + |
| 28 | <i>P. graminea</i>       | P. g-28 | <i>H. vulgare</i>     | Hainan, Qinghai  | + |
| 29 | <i>P. graminea</i>       | P. g-29 | <i>H. vulgare</i>     | Hainan, Qinghai  | + |
| 30 | <i>P. graminea</i>       | P. g-30 | <i>H. vulgare</i>     | Hainan, Qinghai  | + |
| 31 | <i>P. graminea</i>       | P. g-31 | <i>H. vulgare</i>     | Haixi, Qinghai   | + |
| 32 | <i>P. graminea</i>       | P. g-32 | <i>H. vulgare</i>     | Hainan, Qinghai  | + |
| 33 | <i>P. graminea</i>       | P. g-33 | <i>H. vulgare</i>     | Hainan, Qinghai  | + |
| 34 | <i>P. graminea</i>       | P. g-34 | <i>H. vulgare</i>     | Hainan, Qinghai  | + |
| 35 | <i>P. graminea</i>       | P. g-35 | <i>H. vulgare</i>     | Haixi, Qinghai   | + |
| 36 | <i>P. graminea</i>       | P. g-36 | <i>H. vulgare</i>     | Haixi, Qinghai   | + |
| 37 | <i>P. graminea</i>       | P. g-37 | <i>H. vulgare</i>     | Haixi, Qinghaiv  | + |
| 38 | <i>P. graminea</i>       | P. g-38 | <i>H. vulgare</i>     | Haixi, Qinghai   | + |
| 39 | <i>P. graminea</i>       | P. g-39 | <i>H. vulgare</i>     | Haixi, Qinghai   | + |
| 40 | <i>Pyrenophora avena</i> | P. a-1  | <i>Avena sativa</i> . | -                | — |

|    |                                  |        |                            |                 |   |
|----|----------------------------------|--------|----------------------------|-----------------|---|
| 41 | <i>Ustilago hordei</i>           | U. h-1 | <i>H. vulgare</i>          | Xining, Qinghai | — |
| 42 | <i>Ustilago nuda</i>             | U. n-1 | <i>H. vulgare</i>          | Xining, Qinghai | — |
| 43 | <i>Dactylobotrys graminicola</i> | D. g-1 | <i>H. vulgare</i>          | Haibei, Qinghai | — |
| 44 | <i>Alternaria alternata</i>      | A. a-1 | <i>H. vulgare</i>          | Xining, Qinghai | — |
| 45 | <i>Fusarium graminearum</i>      | F. g-1 | <i>H. vulgare</i>          | -               | — |
| 46 | <i>Pyricularia oryzae</i>        | P. o-1 | <i>Oryza sativa</i> .      | -               | — |
| 47 | <i>Puccinia striiformis</i>      | P. s-1 | <i>Triticum aestivum</i> . | Xining, Qinghai | — |
